# Supplementary material
Source: PubMed Central journal article supplement (PMC2265169)
Supplement: pnas_0710897105_1.pdf [file pnas_0710897105_1.pdf]

ACAGCAAAGTTACGAAGATAAAAAATAATATTACT -610

ACTCAATTTAACTAAAAAACACTTCAAAAATTATTCAACAGTTGATATACTTTTAGCAAACCTCTCCTTTTTATTGTAAATTTTCGATA -523  
GAAAAAATACTACGTACATTTGAATTGAATAGATAAATTTCTTAGCATATGTCCTCTAAATTCATTACCACCAACATCAGTGATCCTC -436  
ACAGTGATTTCTTGACGACCTGGTAGCGAAATTCGCCGAATATAAAAAATCCGCACCAACCGTTTTGATTATACTGTCTTGTAATAATCA -349  
TCATAACAGAAATCTCCTAATTATGCTTGTCTACAATTAATTCAAAAATAAGCTAACTCATAAAAACTGGACAAACCTTTCCAACA -262  
CTGGGCTCCCCACAACAACAATTTTCAATTGTCTCCCGACACTTTCCTCCTCCGAATCCGACATACTCGCACCTTATTACCAATGC -175  
ATTTACAAAAATCACCTTATAAGAAACGCATATTAGAAAGCCACCAATCACCATAACAAAACAAAATCTCTTGAGTGCCTTTTTAAAA -88  
TTGCGAGTGCACACAAAAACACATCCACAAGCACAAATATAAAAGCGAAGCCCCAACACAACCAACCAACTGCACCACAAACCGCCACA -1

ATG TCC ACA ATC ATC ACT TCG ATC ATT TTA CTC GTT TTG AGC GAA TCT TTA GTT TCA GGA TGT CTC 66  
**Met Ser Thr Ile Ile Thr Ser Ile Ile Leu Leu Val Leu Ser Glu Ser Leu Val Ser Gly Cys Leu** 22

ATT ACC AAC TGT CCT CGC GGC GGC AAA CGG AGC AAG TTT GCC ATA AGT GAA AAC GCC GTC AAA CCG 132  
**Ile Thr Asn Cys Pro Arg Gly** Gly **Lys Arg** Ser Lys Phe Ala Ile Ser Glu Asn Ala Val Lys Pro 44

**TGT** GTG AGT TGC GGT CCC GGC CAA AGC GGG CAA TGT TTC GGC CCC AGC ATT TGC TGC GGA CCT TTC 198  
Cys Val Ser Cys Gly Pro Gly Gln Ser Gly Gln Cys Phe Gly Pro Ser Ile Cys Cys Gly Pro Phe 66

GGG TGT CTT GTG GGA ACC CCC GAG ACG CTG CGT TGC CAA CGT GAG GGC TTT TTC CAC GAA CGC GAG 264  
Gly Cys Leu Val Gly Thr Pro Glu Thr Leu Arg Cys Gln Arg Glu Gly Phe Phe His Glu Arg Glu 88

CCC TGC ATT GCC GGC AGC GCC CCC TGC AGG AAA AAC ACA GGG CGG TGC GCT TTC GAC GGG ATT TGT 330  
Pro Cys Ile Ala Gly Ser Ala Pro Cys Arg Lys Asn Thr Gly Arg Cys Ala Phe Asp Gly Ile Cys 110

TGC AGT CAA **GAC** TCT TGC CAT GCG GAT AAA AGC TGT GCC AGT GAC GAT AAA AGT CCG ATA GAT TTG 396  
Cys Ser Gln **Asp** Ser Cys His Ala Asp Lys Ser Cys Ala Ser Asp Asp Lys Ser Pro Ile Asp Leu 132

TAC ACT CTC ATT AAT TAC CAA GCT GAG TTG GCT GGT GAT AAA TAA AAAAAATCAATAATTAAGCTTATTTTCGC 468  
Tyr Thr Leu Ile Asn Tyr Gln Ala Glu Leu Ala Gly Asp Lys \* 146

AAGTCATGACAAATTAATGTCTTGTTATTTAAGTGTGTGAAGAACTTTTTGAGCAATTGTCAAATAAAAGCGGTATCAGT(A)<sub>n</sub> 545
