# Supplementary material
Source: PubMed Central journal article supplement (PMC2265169)
Supplement: pnas_0710897105_4.pdf [file pnas_0710897105_4.pdf]

Table 3. Intron/exon boundaries of the inotocin receptor gene

| Intron | 5'-Donor   | Intron size (bp) | 3'-Acceptor | Intron phase |
|--------|------------|------------------|-------------|--------------|
| 1      | AG<br>Arg  | gtagtta... 60    | ...ccccag   | A Arg 2      |
| 2      | CAG<br>Gln | gtgagct... 2691  | ...cttccag  | CTG Leu 3    |
| 3      | TG<br>Trp  | gttaaac... 49    | ...cttttag  | G Trp 2      |
| 4      | G<br>Gly   | gtaagca... 3592  | ...gttccag  | GC Gly 1     |
| 5      | G<br>Gly   | gtgcgta... 117   | ...ggcacag  | GT Gly 1     |
