# Supplementary material
Source: PubMed Central journal article supplement (PMC2265169)

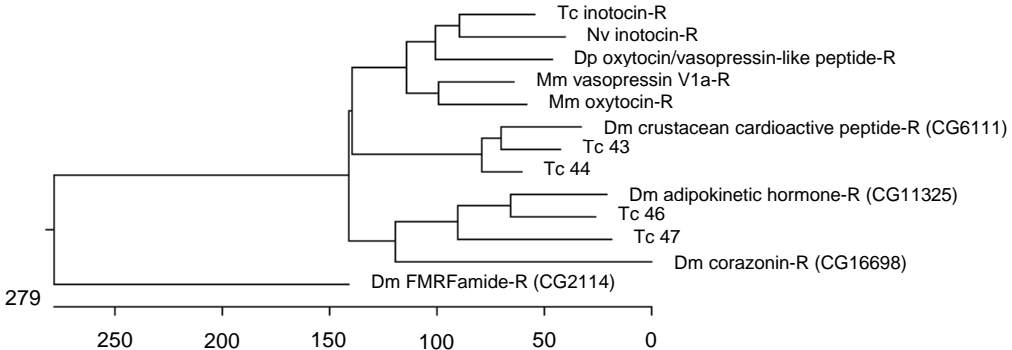

Supplement: pnas_0710897105_3.pdf [file pnas_0710897105_3.pdf]
